# Supplementary material for: Effects of Geometric Sound on Brainwave Activity Patterns, Autonomic Nervous System Markers, Emotional Response, and Faraday Wave Pattern Morphology
Source: Evid Based Complement Alternat Med. 2024 Mar 29;2024:9844809. doi: 10.1155/2024/9844809 (PMC10997421; doi:10.1155/2024/9844809)
Supplement: Supplementary Materials — S1 Supplementary 1: Sound Samples & Data: https://osf.io/y3ef2. S2 Supplementary 2: Custom Questionnaire: https://osf.io/nmjts. S3 Supplementary 3: Connectivity Patterns at Sporadic Frequencies: https://osf.io/awrsq. S4 Supplementary 4: General Free Testimonials EX1 + EX2: https://osf.io/qbz3g. [file 9844809.f1.zip]

Archive with 4 entries (4 files):
- Supplementary 1_Sound Samples & Data.....docx
- Supplementary 2_Custom Questionnaire....docx
- Supplementary 3_Additional Connectivity Patterns.....docx
- Supplementary 4_General Free Testimonials .....docx
